# Supplementary material for: Three-Dimensional Bioprinting of Organoid-Based Scaffolds (OBST) for Long-Term Nanoparticle Toxicology Investigation
Source: MDPI journal article supplement (doi:10.3390/ijms24076595), 2023-04-01
Supplement: s1 [file s1]

**Supplementary Table S1. Cell cycle in unprinted and printed cells at different time-ponts. Mean±SD. N=3 each.**

|       | 2D       | 3D T0    | 3D T24h  | 3D T72h  |
|-------|----------|----------|----------|----------|
| G0/G1 | 63.7±3.6 | 65.2±3.8 | 64.8±3.9 | 80.6±4.2 |
| S     | 18.2±1.8 | 14.7±1.3 | 14.8±1.6 | 10.5±1.2 |
| G2/M  | 18.1±1.9 | 20.1±1.9 | 20.4±2.1 | 8.9±1.1  |

A

Calu3

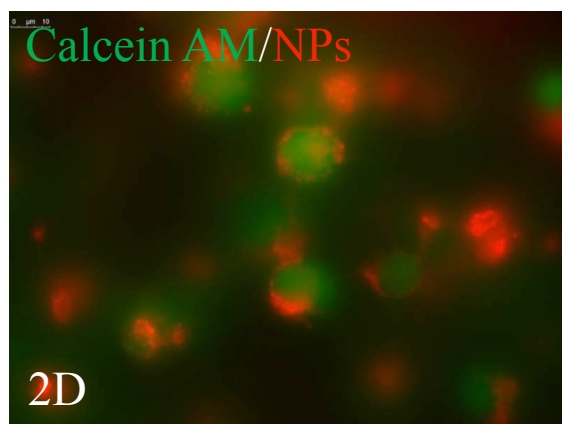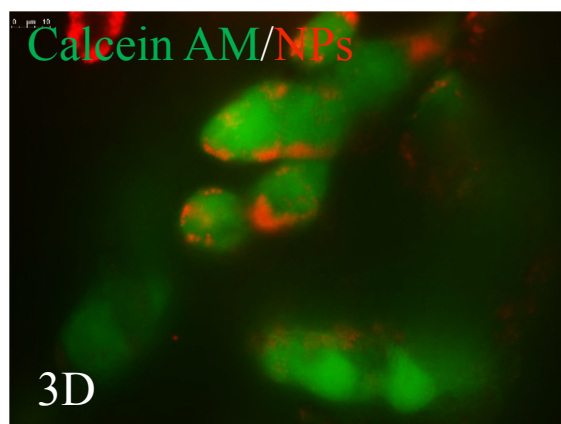

**Supplementary Figure S1.** Live death assay for Calu-3 cells in the presence of fluorescent non-toxic carboxyl-modified 40 nm nanoparticles internalization. Left: conventional 2D culture. Right: 3D Printed OBST
